# Supplementary material for: Relationships among Inflammatory Biomarkers and Objectively Assessed Physical Activity and Sleep during and after Chemotherapy for Gynecologic Malignancies
Source: MDPI journal article supplement (doi:10.3390/cancers15153882), 2023-07-30
Supplement: s1 [file s1]

**Supplemental Table S1.** Sensitivity analyses: Associations of fluctuations in biomarkers of inflammation with sleep and physical activity among patients with gynecologic cancer treated with chemotherapy and noncancer controls excluding those with metastatic disease

| Variable                                    | Moderate to Vigorous Activity |           |           |           |           |           |          |          |
|---------------------------------------------|-------------------------------|-----------|-----------|-----------|-----------|-----------|----------|----------|
|                                             | IL-10                         | IL-1b     | TNF-alpha | TNFR1     | TNFR2     | CRP       | IL6^     | IL-1ra^  |
| Intercept                                   | 1.79***                       | 1.85***   | 1.88***   | 1.75***   | 1.89***   | 1.93***   | 1.84***  | 1.78***  |
| Group                                       | -0.44***                      | -0.68***  | -0.68***  | -0.52**   | -0.68***  | -0.62***  | -0.53*** | -0.52*** |
| Between-person variance in cytokine         | 2.99E-03                      | -6.69E-03 | -8.56E-03 | 5.29E-04  | -8.00E-05 | -0.03     | 0.04     | 7.99E-03 |
| Within-person variance in cytokine          | 2.46E-03                      | -1.65E-03 | -1.77E-03 | -2.00E-05 | 1.80E-05  | 1.38E-03  | -0.01    | 0.02     |
| Group x between-person variance in cytokine | -5.70E-03                     | 0.04      | 0.01      | -3.10E-04 | 9.00E-05  | 0.02      | -0.05    | 4.62E-03 |
| Group x within-person variance in cytokine  | -8.14E-03*                    | 6.46E-03  | -9.87E-03 | 2.80E-05  | -1.00E-05 | -8.03E-03 | -0.01    | -0.06    |

  

| Variable                                    | Light Activity |          |           |           |           |           |          |         |
|---------------------------------------------|----------------|----------|-----------|-----------|-----------|-----------|----------|---------|
|                                             | IL-10          | IL-1b    | TNF-alpha | TNFR1     | TNFR2     | CRP       | IL6^     | IL-1ra^ |
| Intercept                                   | 3.20***        | 3.23***  | 3.24***   | 2.90***   | 3.03***   | 3.29***   | 3.12***  | 3.12*** |
| Group                                       | -0.69***       | -0.78*** | -0.52     | -0.13     | -0.27     | -0.54**   | -0.50*** | -0.25   |
| Between-person variance in cytokine         | -5.99E-03      | -0.03    | -0.02     | 1.03E-03  | 2.80E-05  | -0.05     | -0.07    | -0.04   |
| Within-person variance in cytokine          | -6.55E-03      | -0.04*   | -0.02*    | -3.90E-04 | -1.10E-04 | -8.26E-03 | -0.08*   | -0.03   |
| Group x between-person variance in cytokine | 0.01           | 0.09     | 7.37E-03  | -2.06E-03 | -2.00E-04 | 0.03      | 0.05     | -0.06   |
| Group x within-person variance in cytokine  | -1.03E-03      | 0.03     | 1.63E-03  | -1.77E-03 | -3.00E-05 | -0.04     | 0.05     | -0.06   |

  

| Variable                                    | Sedentary Time |          |           |           |           |          |          |          |
|---------------------------------------------|----------------|----------|-----------|-----------|-----------|----------|----------|----------|
|                                             | IL-10          | IL-1b    | TNF-alpha | TNFR1     | TNFR2     | CRP      | IL6^     | IL-1ra^  |
| Intercept                                   | 10.65***       | 10.66*** | 10.35***  | 11.05***  | 10.79***  | 10.45*** | 10.76*** | 10.75*** |
| Group                                       | 0.65           | 0.83*    | 1.31*     | 0.09      | 0.46      | 0.43     | 0.44     | 0.25     |
| Between-person variance in cytokine         | -1.41E-03      | 0.02     | 0.04*     | -1.73E-03 | -6.00E-05 | 0.06     | 0.06     | 4.19E-03 |
| Within-person variance in cytokine          | 0.01*          | 0.05     | 6.81E-03  | 1.13E-03  | 1.16E-04  | -0.01    | 0.04     | 7.43E-03 |
| Group x between-person variance in cytokine | -1.65E-03      | -0.07    | -0.05     | 3.07E-03  | 1.33E-04  | 3.60E-03 | 0.21     | 0.08     |
| Group x within-person variance in cytokine  | 2.25E-03       | 0.01     | 1.41E-03  | -3.96E-03 | -8.20E-04 | 0.09*    | 0.04     | 0.18     |

  

| Variable                                    | Hours Awake after Sleep Onset |           |           |           |           |           |           |         |
|---------------------------------------------|-------------------------------|-----------|-----------|-----------|-----------|-----------|-----------|---------|
|                                             | IL-10                         | IL-1b     | TNF-alpha | TNFR1     | TNFR2     | CRP       | IL6^      | IL-1ra^ |
| Intercept                                   | 1.50***                       | 1.46***   | 1.37***   | 1.41***   | 1.45***   | 1.34***   | 1.50***   | 1.49*** |
| Group                                       | 0.50**                        | 0.50**    | 0.59**    | 0.49**    | 0.38      | 0.53***   | 0.45***   | 0.73*** |
| Between-person variance in cytokine         | -1.80E-04                     | 3.35E-04  | 8.87E-03  | 3.14E-04  | 6.50E-05  | 0.03      | -8.01E-03 | -0.01   |
| Within-person variance in cytokine          | -2.95E-03                     | -1.18E-03 | -6.24E-03 | -4.20E-04 | -6.00E-05 | 1.76E-03  | -0.01     | -0.05   |
| Group x between-person variance in cytokine | -3.40E-03                     | -0.03     | -0.01     | -4.20E-04 | 2.60E-05  | -0.03     | -0.22     | -0.13   |
| Group x within-person variance in cytokine  | -3.23E-03                     | 0.03      | 6.91E-03  | -2.90E-04 | 1.21E-04  | -1.78E-03 | 0.05      | -0.03   |

| Variable                                    | Sleep Efficiency |           |            |           |           |           |           |           |
|---------------------------------------------|------------------|-----------|------------|-----------|-----------|-----------|-----------|-----------|
|                                             | IL-10            | IL-1b     | TNF-alpha  | TNFR1     | TNFR2     | CRP       | IL6^      | IL-1ra^   |
| Intercept                                   | 0.79***          | 0.80***   | 0.81***    | 0.81***   | 0.81***   | 0.83***   | 0.81***   | 0.81***   |
| Group                                       | -0.04*           | -0.04*    | -0.06*     | -0.03     | -0.03     | -0.05*    | -0.05**   | -0.09***  |
| Between-person variance in cytokine         | 4.53E-04         | 9.87E-04  | -1.35E-03  | -2.00E-05 | -2.00E-05 | -5.15E-03 | 3.82E-03  | -1.29E-03 |
| Within-person variance in cytokine          | -5.20E-04        | -3.78E-03 | -1.92E-03* | 1.90E-05  | 1.90E-05  | -1.97E-03 | -7.80E-03 | -2.31E-03 |
| Group x between-person variance in cytokine | 3.57E-04         | 1.49E-03  | 1.96E-03   | 7.42E-06  | 5.71E-07  | 4.71E-03  | 0.02      | 0.02*     |
| Group x within-person variance in cytokine  | 6.37E-04         | 4.24E-03  | 4.81E-04   | -2.50E-04 | -4.00E-05 | 3.42E-03  | 4.13E-03  | 0.01      |

Analyses controlled for age, education, comorbidities, and menopausal status.

^IL-6 and IL-1Ra were natural log-transformed.

\*\*\* =  $p < .001$ ; \*\* =  $p < .01$ ; \* =  $p < .05$
